# Supplementary material for: Coupled impact of proteins with different molecular weights and surface charges on TiO2 mobility
Source: Royal Society of Chemistry journal article supplement (doi:10.1039/d2en00043a), 2022-01-01
Supplement: d2en00043a1.pdf [file d2en00043a1.pdf]

**Supporting Information for**  
**Coupled impact of proteins with different molecular weights and**  
**surface charges on TiO<sub>2</sub> mobility**

Chaorui Yan<sup>a</sup>, Prabhakar Sharma<sup>b</sup>, Qing Chen<sup>c</sup>, Baoguo Li<sup>a</sup>, Jianying Shang<sup>a\*</sup>

<sup>a</sup> Key Laboratory of Plant-Soil Interactions, Ministry of Education, Key Laboratory of Arable Land Conservation (North China), Ministry of Agriculture, College of Land Science and Technology, China Agricultural University, Beijing 100193, P. R. China

<sup>b</sup> School of Ecology and Environment Studies, Nalanda University, Rajgir, Nalanda, Bihar, India

<sup>c</sup> College of Resources and Environmental Sciences, China Agricultural University, Beijing, 100193, China

---

\* Corresponding author: Tel: +86 10 62733509; Fax: +86 10 62733509;

E-mail address: [jyshang@cau.edu.cn](mailto:jyshang@cau.edu.cn)

## Contents

18 pages, 16 figures, and 2 tables

### Contents

#### XDLVO Calculations (Page S4-S6)

**Fig. S1** The particle size distribution profiles of TiO<sub>2</sub> in the absence/presence of protein at different IS. (Page S7)

**Fig. S2** ATR-FTIR spectra of 8 mg L<sup>-1</sup> different proteins (a), TiO<sub>2</sub> without/with 8 mg L<sup>-1</sup> BSA, OVA, and A-LA (b). (Page S8)

**Fig. S3** TEM images of (a) TiO<sub>2</sub> with 4 mg L<sup>-1</sup> BSA concentration, and (b) TiO<sub>2</sub> with 16 mg L<sup>-1</sup> BSA concentration. The dark color is TiO<sub>2</sub>, and the white one is the adsorption layer of protein. (Page S8)

**Fig. S4** TEM images of TiO<sub>2</sub> in the (a) absence and presence of 8 mg L<sup>-1</sup> (b) BSA, (c) OVA, and (c) A-LA in IS 5 mM NaCl solution. The red area is the enlarged images, shown in Fig. 4. (Page S9)

**Fig. S5** Interaction energy profiles between TiO<sub>2</sub> with different BSA concentrations at IS 1 mM. (Page S9)

**Fig. S6** Interaction energy profiles between TiO<sub>2</sub> with 8 mg L<sup>-1</sup> different protein (BSA/OVA/A-LA) at different IS. (Page S10)

**Fig. S7** Adsorption isotherms of BSA on TiO<sub>2</sub> at IS 1 mM. (Page S10)

**Fig. S8** Electrophoretic mobility (EPM) of TiO<sub>2</sub> in the presence of different proteins at different IS (1, 5, 25, 50, 100 and 200 mM) for pH 7. The dashed lines connect the best-fitted points with the Ohshima's soft particle theory. (Page S11)

**Fig. S9** Nonadsorbed protein in TiO<sub>2</sub> suspension with different BSA concentrations (2, 4, 8, and 16 mg L<sup>-1</sup>) at IS 1 mM, and nonadsorbed protein in TiO<sub>2</sub> suspension with 8 mg L<sup>-1</sup> BSA, OVA, and A-LA at IS 1, 5, 10 mM. (Page S12)

**Fig. S10** Interaction energy profiles between grain surface and TiO<sub>2</sub> with BSA at IS 1 mM. (Page S13)

**Fig. S11** Interaction energy profiles between grain surface and TiO<sub>2</sub> in the absence (w/o) and presence of 8 mg L<sup>-1</sup> BSA, OVA, and A-LA at different IS. (Page S13)

**Fig. S12** Breakthrough curves for different protein at IS (a) 1, (b) 5, (c) 10 mM. (Page S14)

**Fig. S13** The relationship between adsorbed layer thickness and (a) energy barrier or (b) hydrodynamic diameter, under TiO<sub>2</sub> with different BSA concentrations at IS 1 mM conditions. (Page S15)

**Fig. S14** The relationship between adsorbed layer thickness and (a) energy barrier or (b) hydrodynamic diameter under TiO<sub>2</sub> with different molecular weight proteins at IS 10 mM conditions. (Page S15)

**Fig. S15** The relationship between adsorbed layer thickness and (a) energy barrier or (b) breakthrough rates, under TiO<sub>2</sub> with different BSA concentrations at IS 1 mM conditions. (Page S15)

**Fig. S16** The relationship between adsorbed layer thickness and (a) energy barrier or (b) breakthrough rates, under TiO<sub>2</sub> with different molecular weight proteins at IS 10 mM conditions. (Page S16)

**Table S1** Hydrodynamic diameters ( $D_H$ ) of  $\text{TiO}_2$ ,  $\text{TiO}_2$  with different BSA concentrations, and  $\text{TiO}_2$  with different proteins in suspensions prior to and at the end of the column experiment. (Page 17)

**Table S2** Charge density ( $ZN/N_A$ ), adsorbed layer thickness ( $d$ ), and softness parameter ( $1/\lambda$ ) are estimated by fitting electrophoretic mobility with the Ohshima's soft particle theory. (Page 18)

### XDLVO Calculations

Interaction energy profiles of  $\text{TiO}_2$  with proteins were calculated by XDLVO theory. Calculation equations of  $\text{TiO}_2$ - $\text{TiO}_2$  and  $\text{TiO}_2$ -sand were as follows (Einarson et al., 1993; Shang et al., 2010; Song et al., 2011; Sun et al., 2015; Xu et al., 2017):

$$\Phi_{\text{VDW-SS}} = -\frac{A_{121}}{6} \left[ \frac{2R^2}{H(4R+H)} + \frac{2R^2}{(2R+H)^2} + \ln \frac{H(4R+H)}{(2R+H)^2} \right] \quad (\text{S1})$$

$$\Phi_{\text{VDW-SP}} = -\frac{A_{123}R}{6h} \left[ 1 - \frac{5.32h}{\lambda_0} \ln \left( 1 + \frac{\lambda_0}{5.32h} \right) \right] \quad (\text{S2})$$

$$\Phi_{\text{EDL-SS}} = 32\pi\epsilon_0\epsilon_w R\gamma_1^2 \left( \frac{k_B T}{zq} \right)^2 e^{-\kappa H} \quad (\text{S3})$$

$$\Phi_{\text{EDL-SP}} = 64\pi\epsilon_0\epsilon_w R\gamma_1\gamma_2 \left( \frac{k_B T}{zq} \right)^2 e^{-\kappa h} \quad (\text{S4})$$

$$\kappa^{-1} = \sqrt{\frac{\epsilon_0\epsilon_w k_B T}{2N_A I q^2}} \quad (\text{S5})$$

$$\gamma_1 = \tanh \left( \frac{zq\xi_1}{4k_B T} \right) \quad (\text{S6})$$

$$\gamma_2 = \tanh \left( \frac{zq\xi_2}{4k_B T} \right) \quad (\text{S7})$$

$$\Phi_{\text{OSM-SS}} = 0 \quad 2d \leq H \quad (\text{S8})$$

$$\Phi_{\text{OSM-SS}} = \frac{4\pi R N_A}{V} \phi_p^2 \left( \frac{1}{2} - \chi \right) \left( d - \frac{H}{2} \right)^2 \quad d \leq H \leq 2d \quad (\text{S9})$$

$$\Phi_{\text{OSM-SS}} = \frac{4\pi R N_A}{V} \phi_p^2 \left( \frac{1}{2} - \chi \right) d^2 \left[ \frac{H}{2d} - \frac{1}{4} - \ln \left( \frac{H}{d} \right) \right] \quad 0 < H < d \quad (\text{S10})$$

$$\Phi_{\text{ELAS-SS}} = 0 \quad d \leq H \quad (\text{S11})$$

$$\Phi_{\text{ELAS-SS}} = \frac{2\pi RN_A}{M_W} \phi_p d^2 \rho \left\{ \frac{H}{d} \ln \left[ \frac{H}{d} \left( \frac{3 - \frac{H}{d}}{2} \right)^2 \right] - 6 \ln \left( \frac{3 - \frac{H}{d}}{2} \right) + 3 \left( 1 - \frac{H}{d} \right) \right\} \quad H < d \quad (\text{S12})$$

$$\Phi_{\text{OSM-SP}} = \frac{2\pi RN_A}{V} \phi_p^2 \left( \frac{1}{2} - \chi \right) (d - h)^2 \quad d > h > 0 \quad (\text{S13})$$

$$\Phi_{\text{ELAS-SP}} = \frac{2\pi RN_A}{M_W} \phi_p d^2 \rho \left[ \frac{2}{3} - \frac{1}{6} \left( \frac{h}{d} \right)^3 - \left( \frac{h}{2d} \right) + \left( \frac{h}{d} \right) \ln \left( \frac{h}{d} \right) \right] \quad d > h > 0 \quad (\text{S14})$$

$$\phi_p = \frac{3\Gamma_{\text{max}} R^2}{\rho \left[ (d + R)^3 - R^3 \right]} \quad (\text{S15})$$

$$\Phi_{\text{Total-XDLVO}} = \Phi_{\text{VDW}} + \Phi_{\text{EDL}} + \Phi_{\text{OSM}} + \Phi_{\text{ELAS}} \quad (\text{S16})$$

where  $A_{121}$  is the Hamaker constant for TiO<sub>2</sub>-water-TiO<sub>2</sub>,  $A_{123}$  is the Hamaker constant for TiO<sub>2</sub>-water-sand,  $H$  is the separation distance between TiO<sub>2</sub> and TiO<sub>2</sub>,  $h$  is separation distance between TiO<sub>2</sub> and sand surface,  $\lambda_0$  is a characteristic length of 100 nm,  $\epsilon_0$  is the dielectric permittivity of vacuum,  $\epsilon_w$  is the dielectric constant of water,  $N_A$  is Avogadro constant,  $\chi$  is the Flory-Huggins solvency parameter,  $V$  is the molar volume of water,  $\phi_p$  is the volume fraction of the protein,  $\Gamma_{\text{max}}$  is maximum surface concentration,  $\rho$  is the density of the protein,  $M_W$  is the molecular weight of the protein,  $\Phi_{\text{VDW}}$  is van der Waals interaction energies,  $\Phi_{\text{EDL}}$  is electrical double layer interaction energies,  $\Phi_{\text{OSM}}$  is osmotic pressure,  $\Phi_{\text{ELAS}}$  is elastic-steric repulsion.

## References

Einarson, M.B., Berg, J.C., 1993. Electrosteric stabilization of colloidal latex dispersions. *J. Colloid Interf. Sci.* 155(1): 165-172.

- Shang, J.Y., Liu, C.X., Wang, Z.M., Wu, H., Zhu, K.K., Li, J., Liu, J., 2010. In-situ measurements of engineered nanoporous particle transport in saturated porous media. *Environ. Sci. Technol.* 44(21): 8190-8195.
- Song, J.E., Phenrat, T., Marinakos, S., Xiao, Y., Liu, J., Wiesner, M.R., Tilton, R.D., Lowry, G.V., 2011. Hydrophobic interactions increase attachment of gum Arabic- and PVP-coated Ag nanoparticles to hydrophobic surfaces. *Environ. Sci. Technol.* 45(14): 5988-5995.
- Sun, P., Zhang, K.K., Fang, J., Lin, D.H., Wang, M.H., Han, J.Y., 2015. Transport of TiO<sub>2</sub> nanoparticles in soil in the presence of surfactants. *Sci. Total Environ.* 527-528: 420-428.
- Xu, S., Attinti, R., Adams, E., Wei, J., Kniel, K., Zhuang, J., Jin, Y., 2017. Mutually facilitated co-transport of two different viruses through reactive porous media. *Water Res.* 123: 40-48.

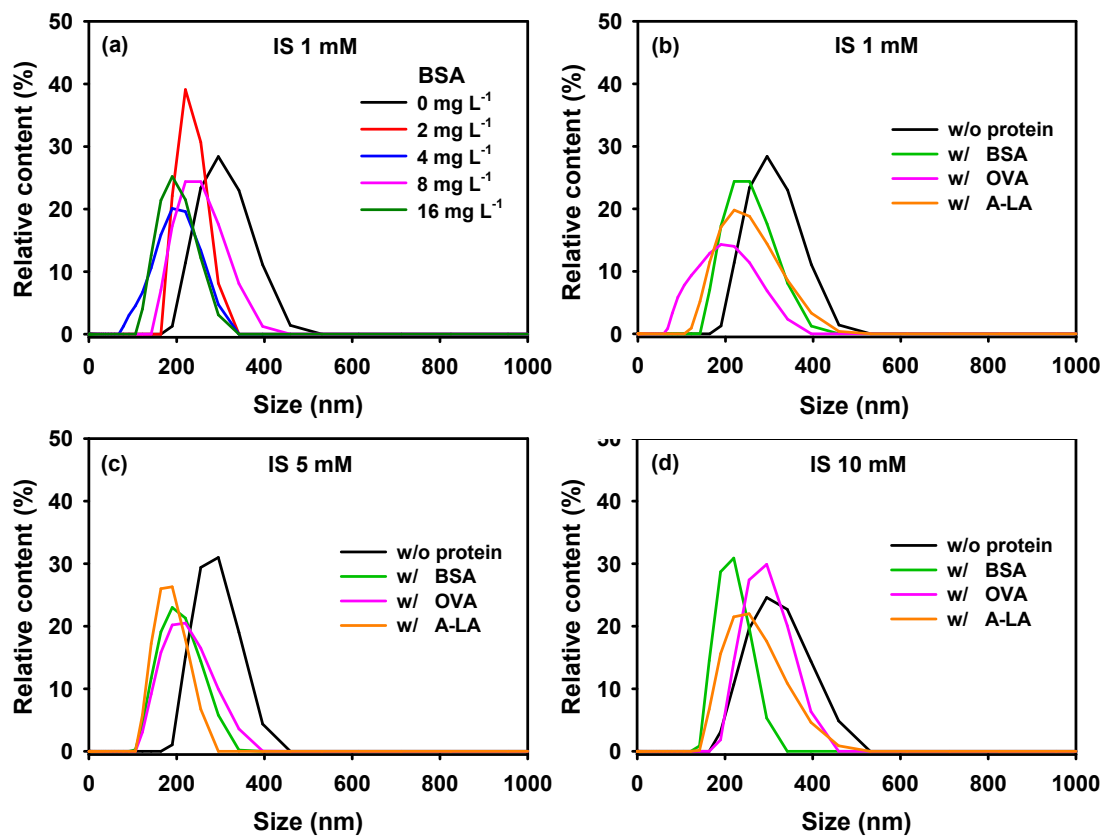

Fig. S1 The particle size distribution profiles of TiO<sub>2</sub> in the absence/presence of protein at different IS.

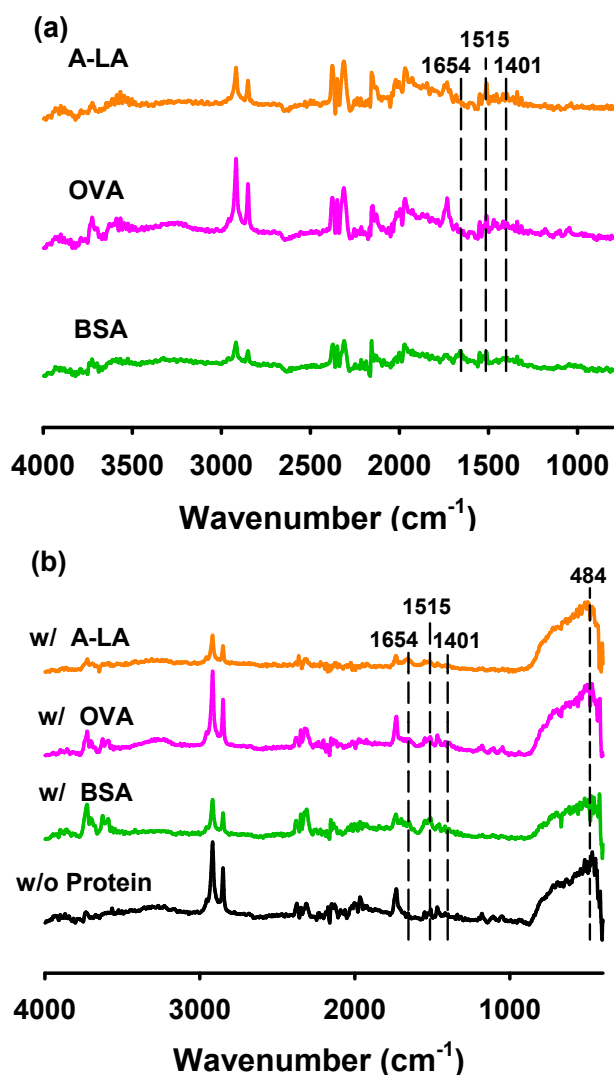

Fig. S2 ATR-FTIR spectra of 8 mg L<sup>-1</sup> different proteins (a),  $\text{TiO}_2$  without/with 8 mg L<sup>-1</sup> BSA, OVA, and A-LA (b).

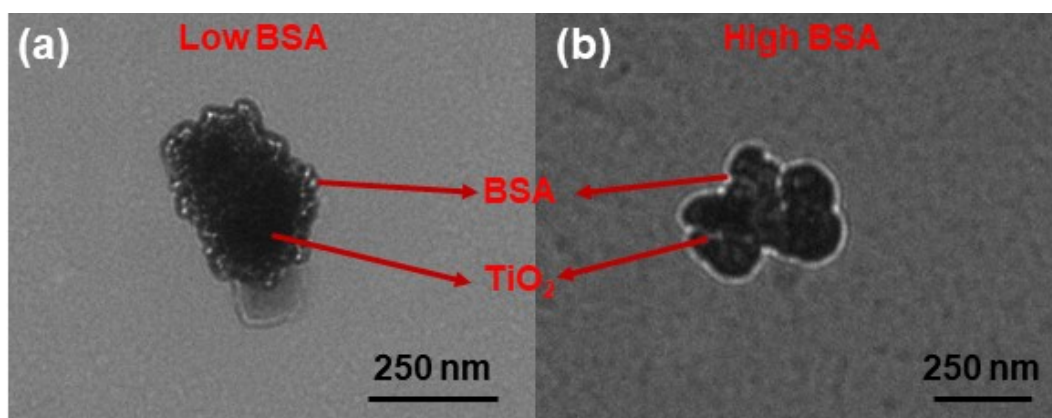

Fig. S3 TEM images of (a)  $\text{TiO}_2$  with 4 mg L<sup>-1</sup> BSA concentration, and (b)  $\text{TiO}_2$  with 16 mg L<sup>-1</sup> BSA concentration at IS 1 mM. The dark color is  $\text{TiO}_2$ , and the white layer is the adsorption layer of protein.

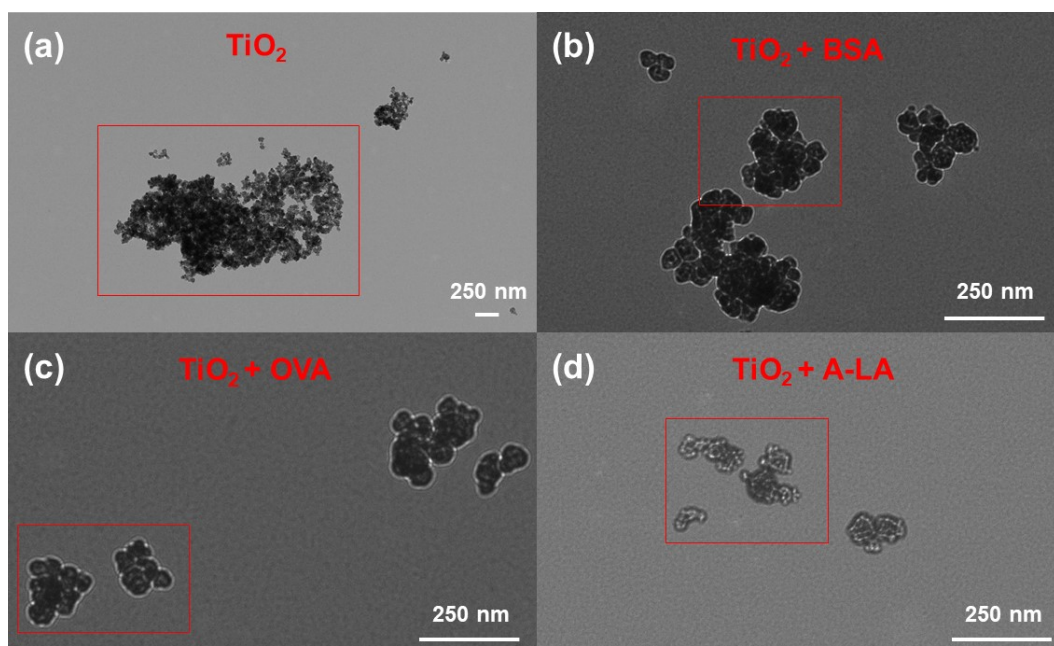

Fig. S4 TEM images of TiO<sub>2</sub> in the (a) absence and presence of 8 mg L<sup>-1</sup> (b) BSA, (c) OVA, and (c) A-LA in IS 5 mM NaCl solution. The red area is the enlarged images, shown in Fig. 4.

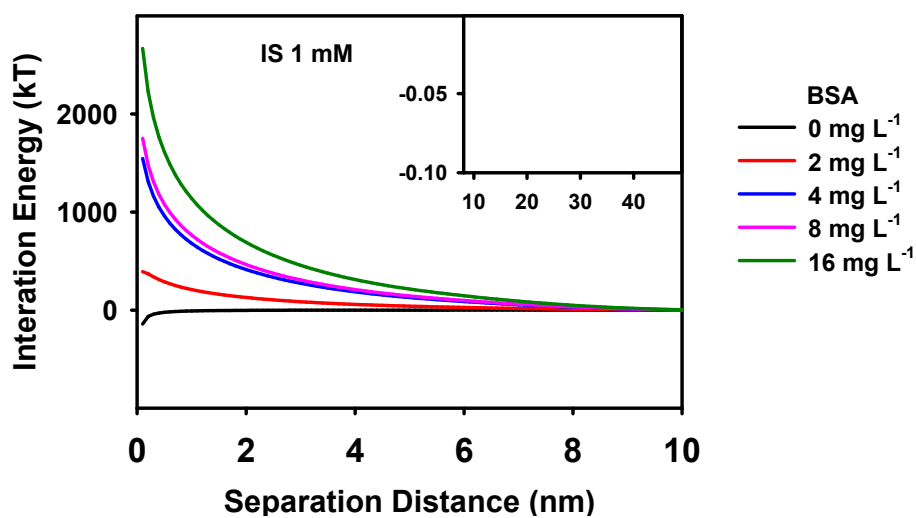

Fig. S5 Interaction energy profiles between TiO<sub>2</sub> with different BSA concentrations at IS 1 mM.

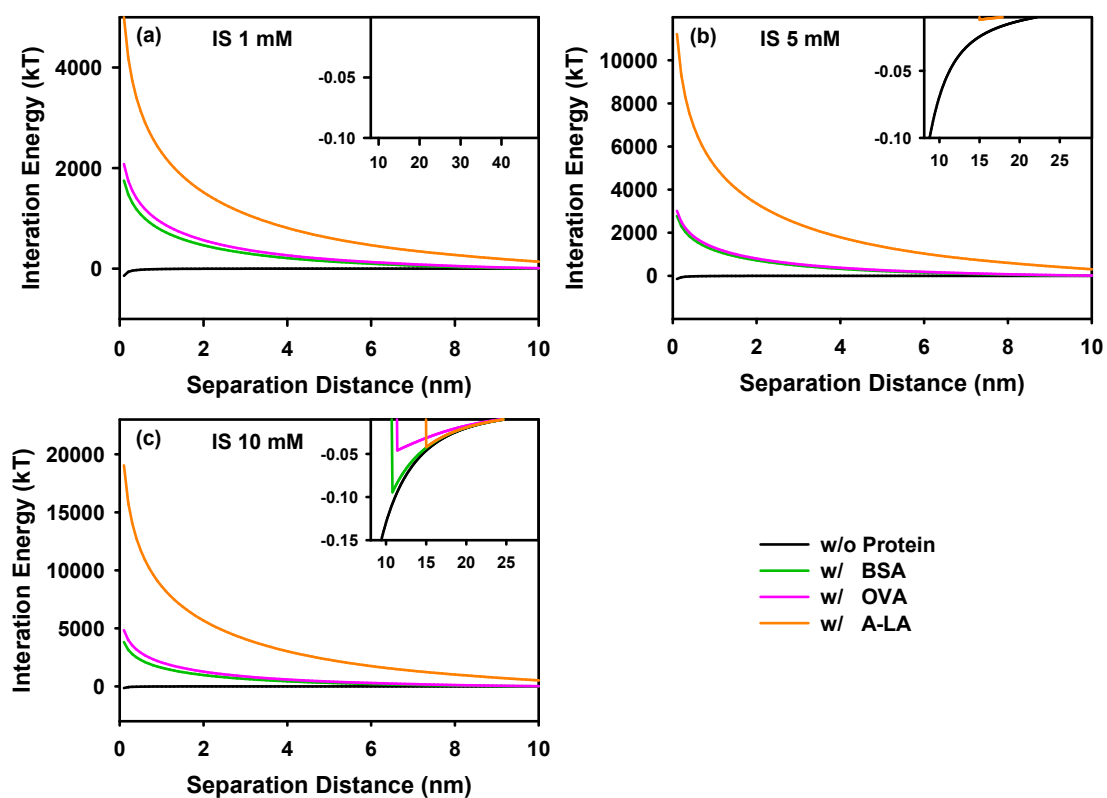

Fig. S6 Interaction energy profiles between  $\text{TiO}_2$  with  $8 \text{ mg L}^{-1}$  different protein (BSA/OVA/A-LA) at different IS.

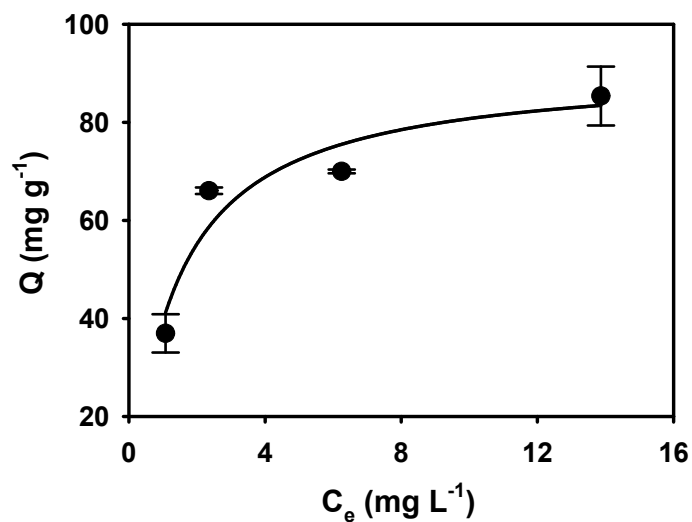

Fig. S7 Adsorption isotherms of BSA on  $\text{TiO}_2$  at IS 1 mM.



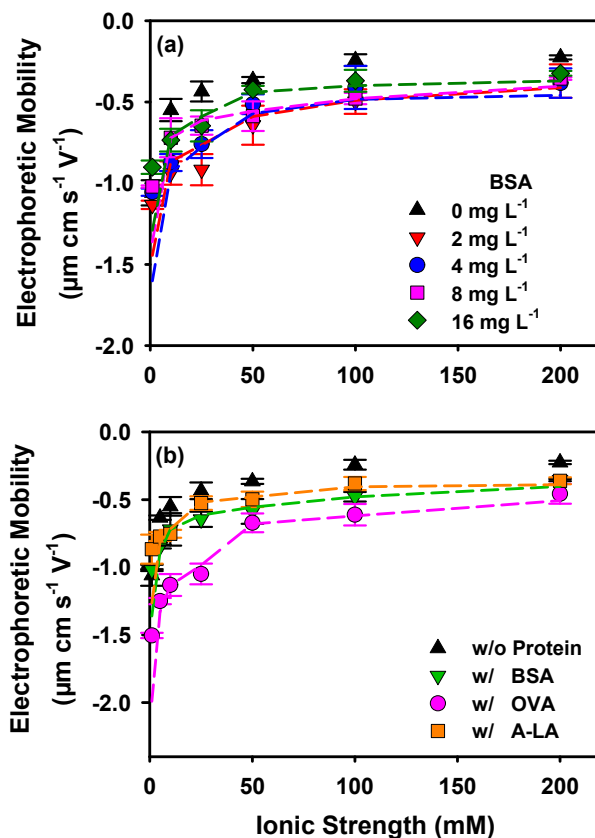

Fig. S8 Electrophoretic mobility (EPM) of  $\text{TiO}_2$  in the presence of different proteins at different IS (1, 5, 25, 50, 100, and 200 mM) for pH 7. The dashed lines connect the best-fitted points with the Ohshima's soft particle theory.

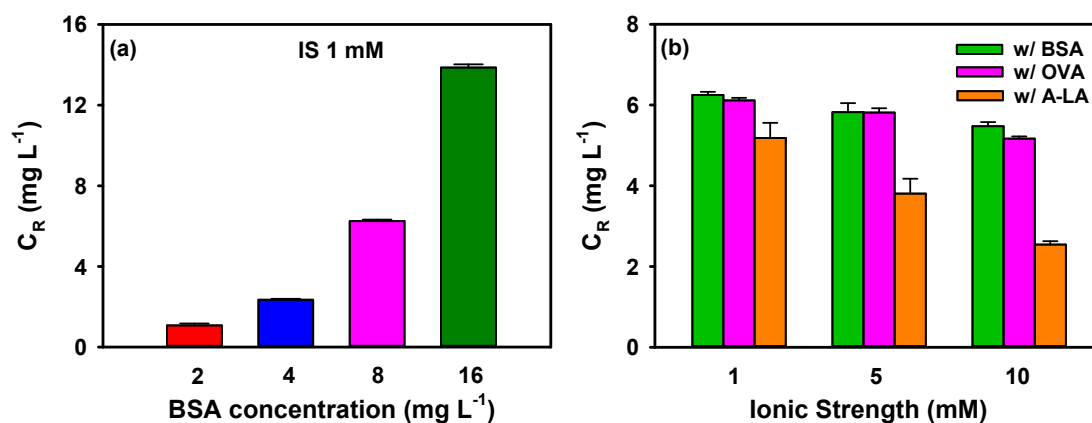

Fig. S9 Nonadsorbed protein in  $\text{TiO}_2$  suspension with different BSA concentrations (2, 4, 8, and 16  $\text{mg L}^{-1}$ ) at IS 1 mM, and nonadsorbed protein in  $\text{TiO}_2$  suspension with 8  $\text{mg L}^{-1}$  BSA, OVA, and A-LA at IS 1, 5, 10 mM.

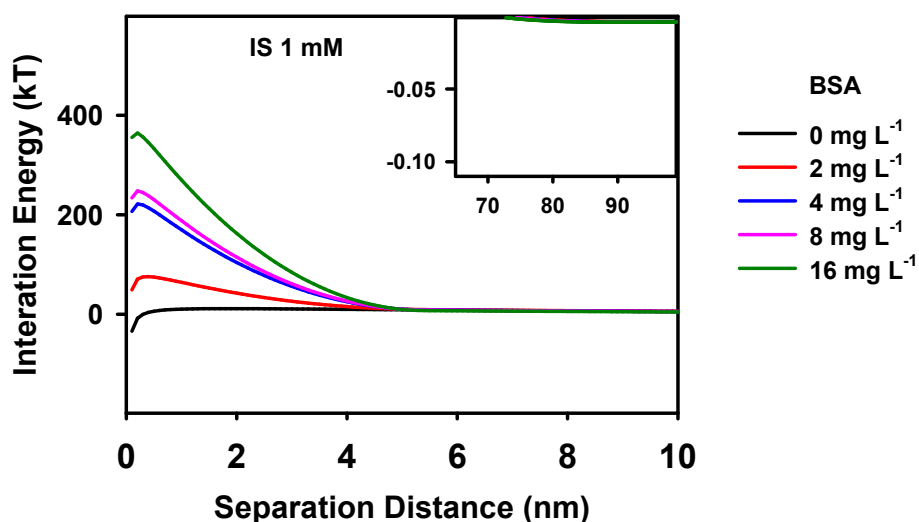

Fig. S10 Interaction energy profiles between grain surface and  $\text{TiO}_2$  with BSA at IS 1 mM.

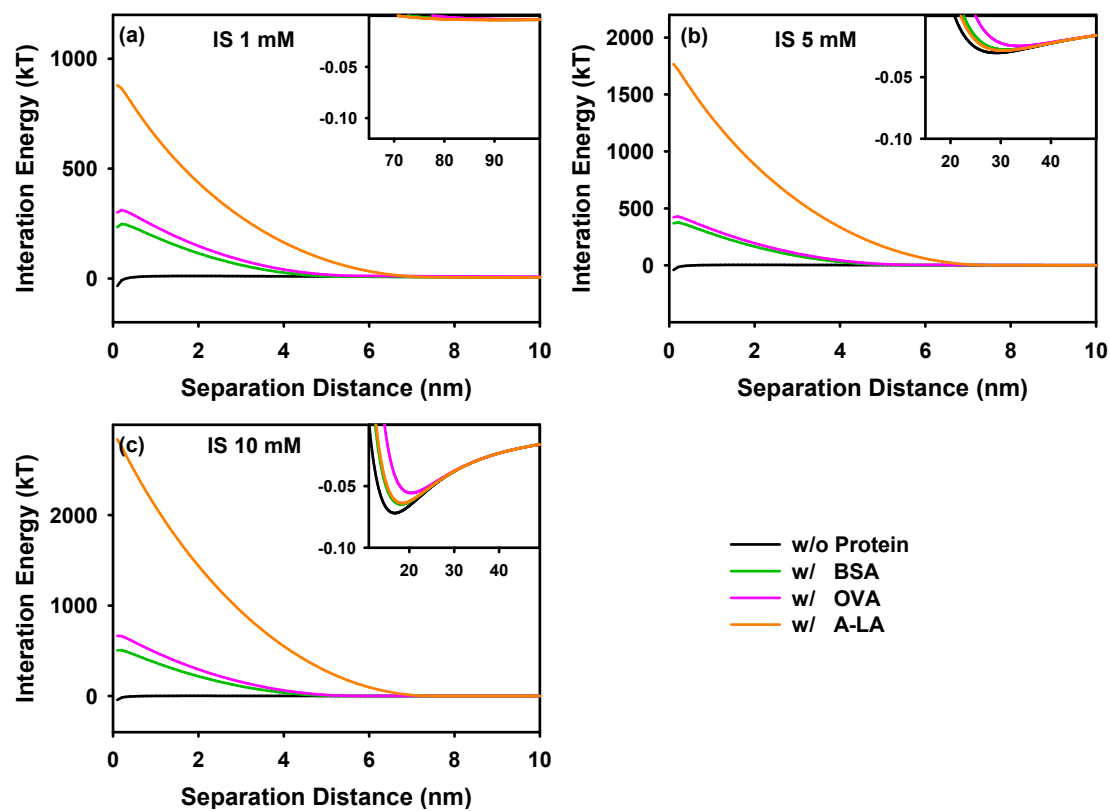

Fig. S11 Interaction energy profiles between grain surface and  $\text{TiO}_2$  in the absence (w/o) and presence of  $8 \text{ mg L}^{-1}$  BSA, OVA, and A-LA at different IS.

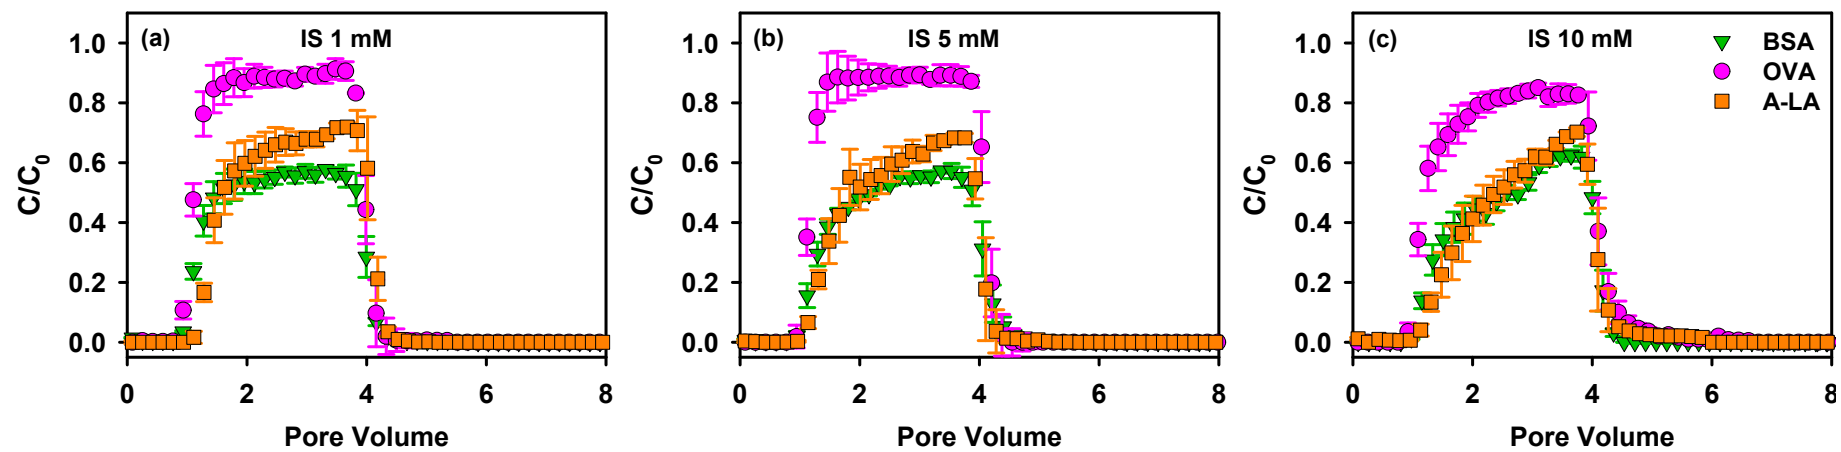

Fig. S12 Breakthrough curves for different protein at IS (a) 1, (b) 5, (c) 10 mM.

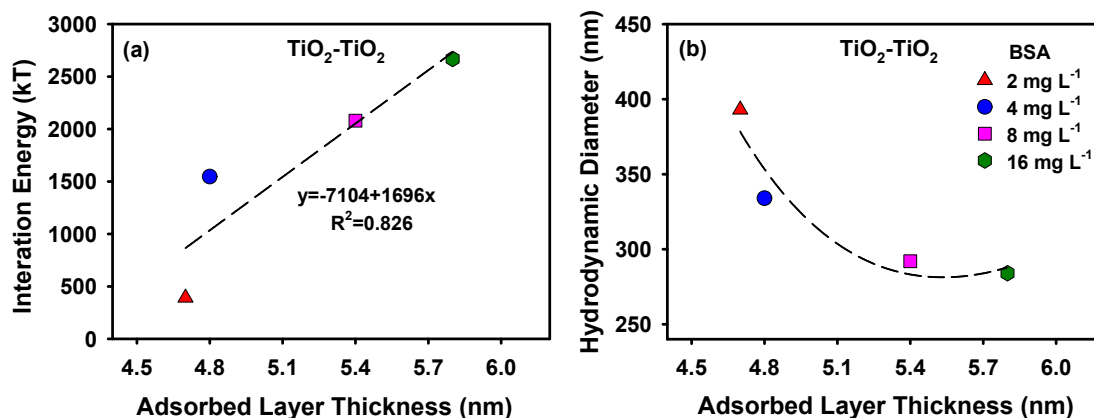

Fig. S13 The relationship between adsorbed layer thickness and (a) energy barrier or (b) hydrodynamic diameter, under TiO<sub>2</sub> with different BSA concentrations at IS 1 mM conditions.

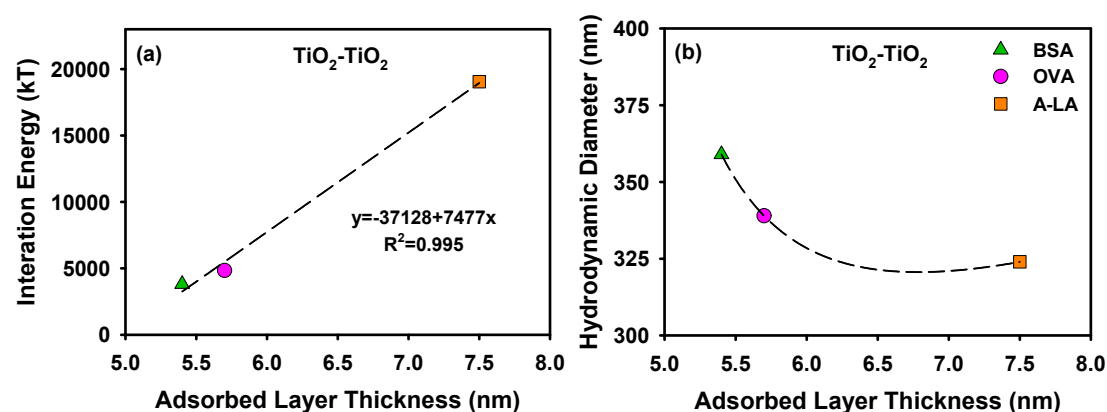

Fig. S14 The relationship between adsorbed layer thickness and (a) energy barrier or (b) hydrodynamic diameter under TiO<sub>2</sub> with different molecular weight proteins at IS 10 mM conditions.

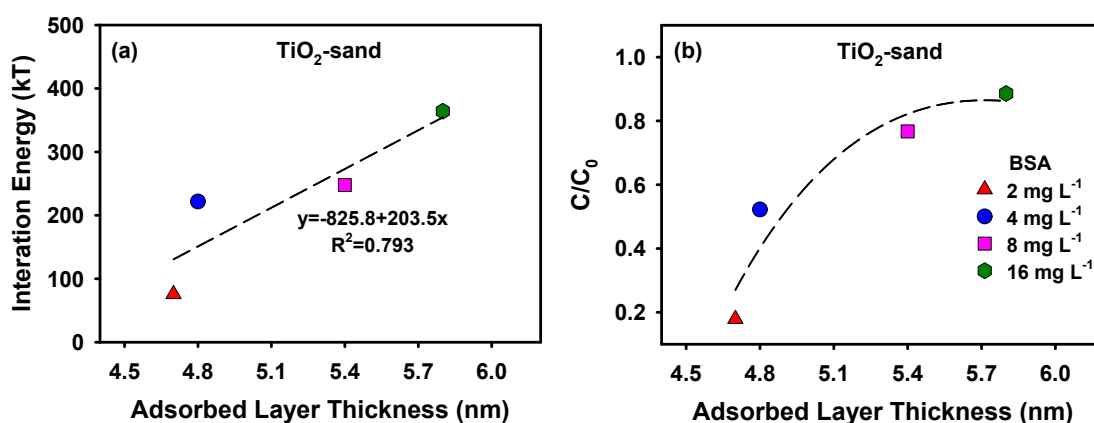

Fig. S15 The relationship between adsorbed layer thickness and (a) energy barrier or (b) breakthrough rates, under TiO<sub>2</sub> with different BSA concentrations at IS 1 mM conditions.

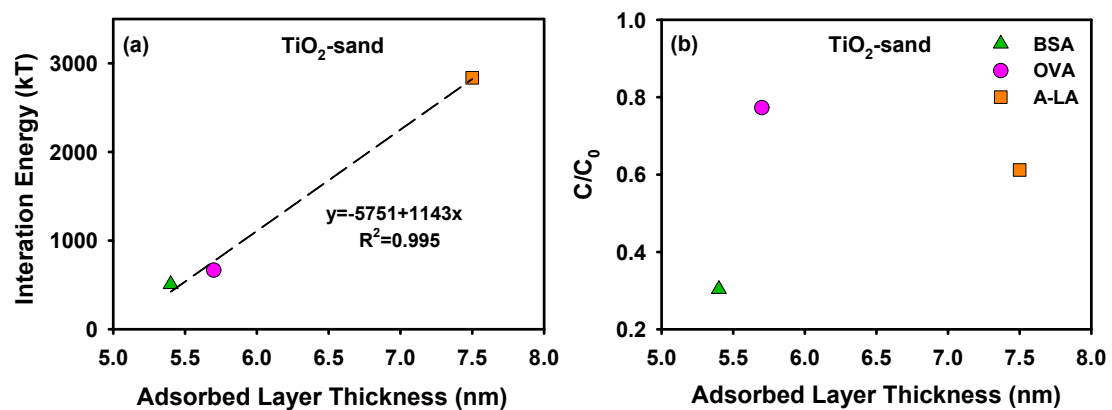

Fig. S16 The relationship between adsorbed layer thickness and (a) energy barrier or (b) breakthrough rates, under  $\text{TiO}_2$  with different molecular weight proteins at IS 10 mM conditions.

Table S1 Hydrodynamic diameters ( $D_H$ ) of  $TiO_2$ ,  $TiO_2$  with different BSA concentrations, and  $TiO_2$  with different proteins in suspensions prior to and at the end of the column experiment.

| IS<br>(mM) | $TiO_2$<br>(mg L <sup>-1</sup> ) | BSA<br>(mg L <sup>-1</sup> ) | OVA<br>(mg L <sup>-1</sup> ) | A-LA<br>(mg L <sup>-1</sup> ) | $D_H$ (nm)                 |                      | $D_H/d_c^a$ |
|------------|----------------------------------|------------------------------|------------------------------|-------------------------------|----------------------------|----------------------|-------------|
|            |                                  |                              |                              |                               | Prior to the<br>experiment | End of<br>experiment |             |
| 1          | 25                               | 0                            | 0                            | 0                             | 378 ± 10                   | 3228 ± 159           | 0.0063      |
| 5          | 25                               | 0                            | 0                            | 0                             | 517 ± 25                   | 4604 ± 235           | 0.0090      |
| 10         | 25                               | 0                            | 0                            | 0                             | 565 ± 13                   | 4865 ± 169           | 0.0095      |
| 1          | 25                               | 2                            | 0                            | 0                             | 393 ± 18                   | 411 ± 13             | 0.0008      |
| 1          | 25                               | 4                            | 0                            | 0                             | 334 ± 35                   | 324 ± 9              | 0.0006      |
| 1          | 25                               | 8                            | 0                            | 0                             | 292 ± 9                    | 277 ± 13             | 0.0006      |
| 1          | 25                               | 16                           | 0                            | 0                             | 284 ± 20                   | 286 ± 10             | 0.0006      |
| 1          | 25                               | 0                            | 8                            | 0                             | 253 ± 6                    | 264 ± 7              | 0.0005      |
| 1          | 25                               | 0                            | 0                            | 8                             | 235 ± 13                   | 253 ± 9              | 0.0005      |
| 5          | 25                               | 8                            | 0                            | 0                             | 296 ± 18                   | 281 ± 10             | 0.0006      |
| 5          | 25                               | 0                            | 8                            | 0                             | 259 ± 31                   | 276 ± 16             | 0.0005      |
| 5          | 25                               | 0                            | 0                            | 8                             | 249 ± 35                   | 256 ± 13             | 0.0005      |
| 10         | 25                               | 8                            | 0                            | 0                             | 359 ± 31                   | 401 ± 28             | 0.0008      |
| 10         | 25                               | 0                            | 8                            | 0                             | 339 ± 20                   | 388 ± 23             | 0.0008      |
| 10         | 25                               | 0                            | 0                            | 8                             | 324 ± 8                    | 389 ± 24             | 0.0008      |

<sup>a</sup> Ratio of average  $TiO_2$  hydrodynamic diameter ( $D_H$ ) at the end of column experiment over median grain size ( $d_c$ )

Table S2 Charge density ( $ZN/N_A$ ), adsorbed layer thickness ( $d$ ), and softness parameter ( $1/\lambda$ ) are estimated by fitting electrophoretic mobility with the Ohshima's soft particle theory.

| Particle         | Protein type | Concentration (mg L <sup>-1</sup> ) | $ZN/N_A$ (mol m <sup>-3</sup> ) | $d$ (nm) | $1/\lambda$ (nm) | R <sup>2</sup> |
|------------------|--------------|-------------------------------------|---------------------------------|----------|------------------|----------------|
| TiO <sub>2</sub> | BSA          | 2                                   | 0.23                            | 4.7      | 5.5              | 0.99           |
|                  | BSA          | 4                                   | 0.33                            | 4.8      | 5.1              | 0.99           |
|                  | BSA          | 8                                   | 0.21                            | 5.4      | 5.8              | 0.98           |
|                  | BSA          | 16                                  | 0.35                            | 5.8      | 5.6              | 0.99           |
|                  | OVA          | 8                                   | 0.72                            | 5.7      | 5.1              | 0.97           |
|                  | A-LA         | 8                                   | 0.58                            | 7.5      | 5.6              | 0.97           |
